# Supplementary material for: Isoforms of U1-70k Control Subunit Dynamics in the Human Spliceosomal U1 snRNP
Source: PubMed Central journal article supplement (PMC2747018; doi:10.1371/journal.pone.0007202), 2009-09-28

Figure S4

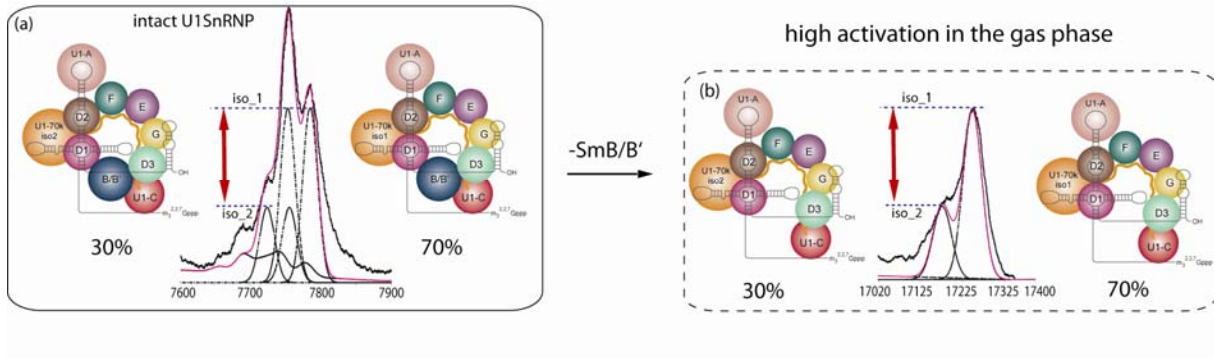

Supplement: pone.0007202.s005.pdf [file pone.0007202.s005.pdf]
