# Supplementary material for: Isoforms of U1-70k Control Subunit Dynamics in the Human Spliceosomal U1 snRNP
Source: PLOS journal article supplement (doi:10.1371/journal.pone.0007202), 2009-09-25

Figure S2

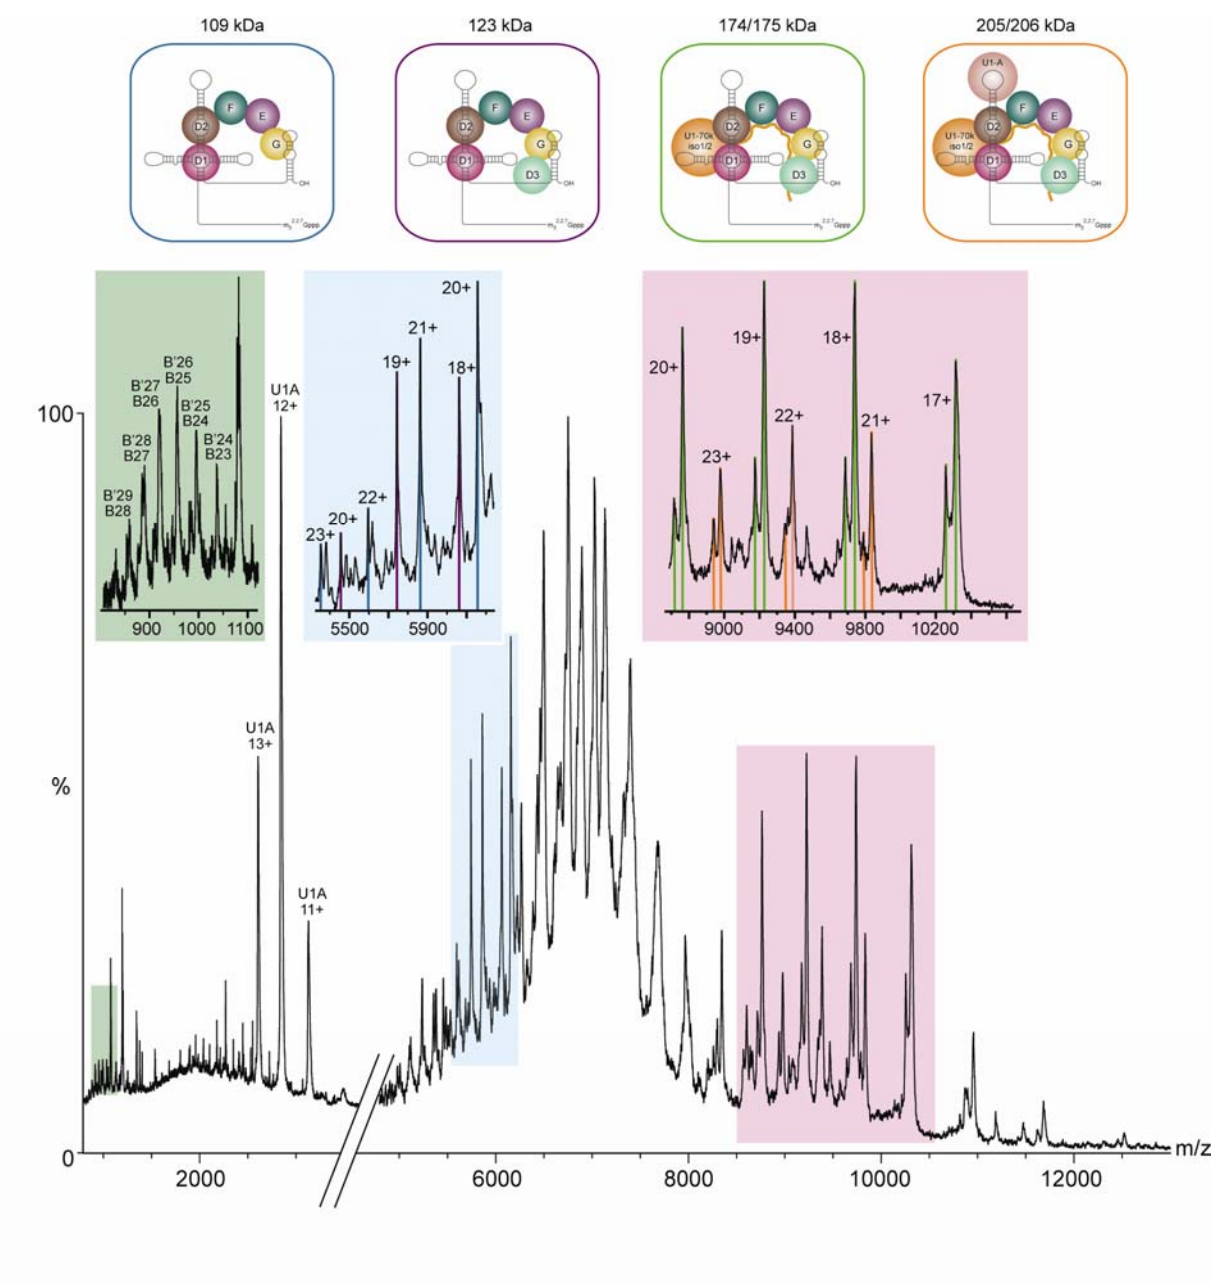

Supplement: S3 (10.1371/journal.pone.0007202.s003) [file journal.pone.0007202.s003]
